# Supplementary material for: 京都学派と嵯峨野高校 (特集 京都学派とその周辺)
Source: Oxford University Press journal article supplement (doi:10.1242/dev.048751), 2013-08-01
Supplement: dev048751tables1.pdf [file dev048751tables1.pdf]

**Table S1. Transgenic tadpoles carrying the knockdown control vector**

| Genetic sex                                                    | ZZ      | ZZ      | ZW      | ZW      |
|----------------------------------------------------------------|---------|---------|---------|---------|
| Transgenesis                                                   | +       | -       | +       | -       |
| Number of tadpoles                                             | 14      | 21      | 15      | 14      |
| Number of individuals with abnormal or sex-reversed gonads (%) | 0 (0 %) | 0 (0 %) | 0 (0 %) | 0 (0 %) |

A psh-control(EGFP) vector was used as a negative control of the *DM-W* knockdown experiment. The genetic sex and transgenesis of the tadpoles at stage 59 were determined by the PCR detection of *DM-W* and transgenes, using genomic DNA from the tail, as described in the Materials and methods.
